# Supplementary material
Source: Springer Nature journal article supplement (https://www.springermedizin.de/resource/supplementary/13018_2008_117_MOESM2_ESM.pdf/9636352)

## Visual Analogue Score

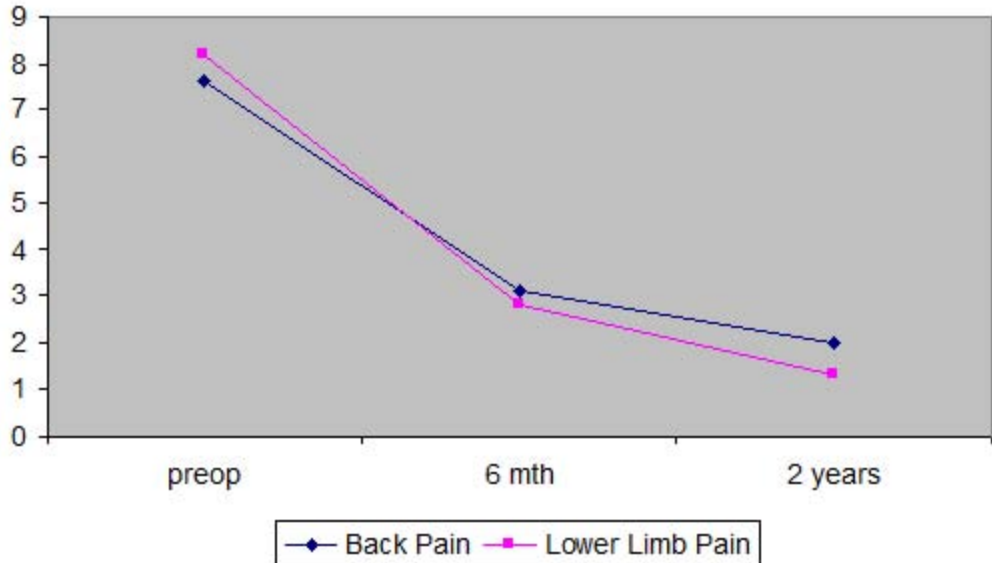

|         | Back Pain |        | Lower Limb Pain |        |
|---------|-----------|--------|-----------------|--------|
| preop   | 7.6       |        | 8.2             |        |
| 6 mth   | 3.1       | p=0.04 | 2.8             | p=0.03 |
| 2 years | 2         | p=0.03 | 1.3             | p=0.01 |

Supplement: MOESM2 [file 9636352]
